# Supplementary material
Source: publisher figshare collection journal article supplement (https://frontiersin.figshare.com/ndownloader/files/13169030)
Supplement: Supplementary file [file 13169030]

## *Supplementary Material*

### **Detailed structural characterization of arabinans and galactans of 14 apple cultivars before and after cold storage**

**Daniel Wefers<sup>1\*</sup>, Ramona Flörchinger<sup>1</sup>, Mirko Bunzel<sup>1</sup>**

**\* Correspondence:** Daniel Wefers: daniel.wefers@kit.edu

#### **1 Supplementary Methods**

##### **1.1 Determination of the non-starch polysaccharides contents**

Non-starch polysaccharide contents were determined according to the dietary fiber method described by Prosky et al. (1988). Briefly, 1 g of untreated, milled apple flour was sequentially digested with 100  $\mu$ L of thermostable  $\alpha$ -amylase, 100  $\mu$ L of protease, and 200  $\mu$ L of amyloglucosidase. Insoluble dietary fiber/non-starch polysaccharides were recovered by filtration and soluble polysaccharides were precipitated from the supernatant by adding of 4 volumes of ethanol. The insoluble and soluble dietary fiber/non-starch polysaccharide contents were corrected for protein (determined as  $\text{NH}_4^+$  according to Willis et al. (1996) after Kjeldahl digestion, nitrogen conversion factor of 6.25) and ash (incineration for 5 h at 525 °C). All analyses were performed in duplicate (technical replicates).

##### **1.2 Monosaccharide analysis after acidic hydrolysis**

Sulfuric acid hydrolysis of the apple non-starch polysaccharides was performed according to Saeman et al. (1945). The samples (10 mg) were swollen in 150  $\mu$ L of 12 M sulfuric acid for 2.5 h, diluted with 975  $\mu$ L of water, and hydrolyzed for 3 h at 100°C. After filtration and dilution, the hydrolysate was analyzed by high performance anion exchange chromatography with pulsed amperometric detection (HPAEC-PAD) using an ICS-5000 system (Thermo Scientific Dionex, Sunnyvale, CA) equipped with a CarboPac PA20 column (150 mm x 3 mm i.d., 6.5  $\mu$ m particle size, Thermo Scientific Dionex). A flow rate of 0.4 mL/min and a gradient composed of (A) bidistilled water, (B) 0.1 M sodium hydroxide, and (C) 0.1 M sodium hydroxide + 0.2 M sodium acetate were used at 25°C: Before every run, the column was rinsed with 100% B for 10 min and equilibrated for 20 min with 90% A and 10% B. After injection, the following gradient was applied: 0-1.5 min, from 90% A and 10% B to 96% A and 4% B; 1.5-22 min, isocratic, 96% A and 4% B; 22-32 min, from 96% A and 4% B to 100% B; 32-42 min, isocratic, 100% C. Methanolysis in combination with trifluoroacetic acid (TFA) hydrolysis was carried out as described previously (De Ruiter et al., 1992; Wefers and Bunzel, 2015). Briefly, 2 mL of methanolic HCl (1.25 M) was added to the sample (10 mg), and methanolysis was performed for 16 h at 80°C. An aliquot was evaporated, hydrolyzed with 2 M TFA (500  $\mu$ L) for 1 h, evaporated to dryness, and the monosaccharide composition was analyzed by HPAEC-PAD as described above. In addition, the colorimetric approach described by Blumenkrantz and Asboe-Hansen (1973) was used as an additional method to determine the galacturonic acid content of the apple non-starch polysaccharides.

*References*

- Blumenkrantz, N., and Asboe-Hansen, G. (1973). New method for quantitative determination of uronic acids. *Anal. Biochem.* 54, 484-489.
- De Ruiter, G.A., Schols, H.A., Voragen, A.G.J., and Rombouts, F.M. (1992). Carbohydrate analysis of water-soluble uronic acid-containing polysaccharides with high-performance anion-exchange chromatography using methanolysis combined with TFA hydrolysis is superior to four other methods. *Anal. Biochem.* 207, 176-185.
- Prosky, L., Asp, N.G., Schweizer, T.F., Devries, J.W., and Furda, I. (1988). Determination of insoluble, soluble, and total dietary fiber in foods and food products: Interlaboratory study. *J. AOAC Int.* 71, 1017-1023.
- Saeman, J.F., Bubl, J.L., and Harris, E.E. (1945). Quantitative saccharification of wood and cellulose. *Ind. Eng. Chem., Anal. Ed.* 17, 35-37.
- Wefers, D., and Bunzel, M. (2015). Characterization of dietary fiber polysaccharides from dehulled, common buckwheat (*Fagopyrum esculentum*) seeds. *Cereal Chem.* 92, 598-603.
- Willis, R.B., Montgomery, M.E., and Allen, P.R. (1996). Improved method for manual, colorimetry determination of total Kjeldahl nitrogen using salicylate. *J. Agric. Food Chem.* 44, 1804-1807.

## 2 Supplementary Tables

**Supplementary Table 1:** Insoluble and soluble non-starch polysaccharide (NSP) contents (g/100 g dry matter) of different apple cultivars before and after storage.

|                   |               | <b>Insoluble<br/>NSP</b> | <b>R/2</b> | <b>Soluble<br/>NSP</b> | <b>R/2</b> |
|-------------------|---------------|--------------------------|------------|------------------------|------------|
| Galiwa            | <i>fresh</i>  | 6.7                      | 0.1        | 4.2                    | 0.2        |
|                   | <i>stored</i> | 7.0                      | 0.0        | 5.6                    | 1.4        |
| Pinova Evelina    | <i>fresh</i>  | 9.0                      | 0.2        | 4.9                    | 0.4        |
|                   | <i>stored</i> | 8.8                      | 0.1        | 5.2                    | 0.7        |
| Elstar v. d. Zalm | <i>fresh</i>  | 7.0                      | 0.0        | 4.8                    | 1.0        |
|                   | <i>stored</i> | 6.8                      | 0.1        | 4.1                    | 0.5        |
| Red Topaz         | <i>fresh</i>  | 6.9                      | 0.1        | 7.6                    | 1.1        |
|                   | <i>stored</i> | 6.7                      | 0.1        | 4.4                    | 0.5        |
| PRI 037           | <i>fresh</i>  | 9.5                      | 0.1        | 3.7                    | 0.0        |
|                   | <i>stored</i> | -                        | -          | -                      | -          |
| Gemini            | <i>fresh</i>  | 8.9                      | 0.0        | 5.4                    | 0.5        |
|                   | <i>stored</i> | 8.5                      | 0.1        | 4.5                    | 0.3        |
| Zari              | <i>fresh</i>  | 6.6                      | 0.1        | 3.9                    | 0.6        |
|                   | <i>stored</i> | -                        | -          | -                      | -          |
| PRI 010           | <i>fresh</i>  | 7.4                      | 0.1        | 6.1                    | 0.1        |
|                   | <i>stored</i> | -                        | -          | -                      | -          |
| Crimson Crisp     | <i>fresh</i>  | 9.3                      | 0.0        | 5.3                    | 0.2        |
|                   | <i>stored</i> | 9.8                      | 0.1        | 4.9                    | 1.0        |
| Isaaq             | <i>fresh</i>  | 8.7                      | 0.0        | 3.3                    | 0.3        |
|                   | <i>stored</i> | 9.6                      | 0.1        | 5.7                    | 1.4        |
| Allurel           | <i>fresh</i>  | 6.9                      | 0.1        | 2.9                    | 0.1        |
|                   | <i>stored</i> | 6.9                      | 0.4        | 3.3                    | 0.2        |
| Natyra            | <i>fresh</i>  | 8.3                      | 0.0        | 2.2                    | 0.5        |
|                   | <i>stored</i> | -                        | -          | -                      | -          |
| Lubera            | <i>fresh</i>  | 10.9                     | 0.3        | 4.9                    | 1.2        |
|                   | <i>stored</i> | -                        | -          | -                      | -          |

All analyses were performed in duplicate (technical replicates); relative half range uncertainties were mostly < 5 %.

**Supplementary Table 2:** Monosaccharide composition (mol%) of the non-starch polysaccharides of different apple cultivars before and after storage. The monosaccharide composition was determined by high performance anion exchange chromatography after H<sub>2</sub>SO<sub>4</sub> hydrolysis.

|                      | A    | B    | C    | D    | E    | F    | G    | H    | I    | J    | K    | L    | M    | N    |
|----------------------|------|------|------|------|------|------|------|------|------|------|------|------|------|------|
| Fucose               | 1.7  | 1.5  | 1.6  | 2.0  | 1.7  | 1.5  | 1.8  | 2.0  | 1.8  | 1.8  | 1.7  | 1.6  | 1.6  | 1.9  |
| Rhamnose             | 1.5  | 1.4  | 1.8  | 1.7  | 1.4  | 1.5  | 1.6  | 1.7  | 1.4  | 1.6  | 1.8  | 1.7  | 1.6  | 1.7  |
| Arabinose            | 16.8 | 19.3 | 18.4 | 17.0 | 17.1 | 15.6 | 18.5 | 18.9 | 17.7 | 19.3 | 17.8 | 17.4 | 16.5 | 16.7 |
| Galactose            | 8.7  | 10.9 | 9.7  | 7.2  | 12.3 | 14.3 | 9.0  | 10.2 | 12.0 | 9.6  | 8.2  | 16.4 | 14.7 | 7.0  |
| Glucose              | 38.1 | 36.2 | 38.2 | 43.3 | 37.5 | 36.4 | 37.8 | 35.1 | 36.8 | 38.0 | 38.9 | 34.4 | 36.3 | 39.6 |
| Xylose               | 10.6 | 9.6  | 10.2 | 12.4 | 10.4 | 10.0 | 11.8 | 11.5 | 11.1 | 12.1 | 10.4 | 10.2 | 10.2 | 11.6 |
| Mannose              | 7.4  | 6.7  | 6.1  | 4.2  | 5.2  | 5.9  | 6.6  | 7.5  | 5.9  | 5.0  | 5.9  | 4.5  | 4.8  | 5.8  |
| Galacturonic acid    | 15.2 | 14.5 | 14.0 | 12.3 | 14.4 | 14.7 | 13.0 | 13.1 | 13.3 | 12.5 | 15.3 | 13.7 | 14.2 | 15.7 |
| Glucuronic acid      | tr   | tr   | tr   | tr   | tr   | tr   | tr   | tr   | tr   | tr   | tr   | tr   | tr   | tr   |
| <b>After storage</b> |      |      |      |      |      |      |      |      |      |      |      |      |      |      |
| Fucose               | 2.3  | 2.0  | 2.5  |      | 2.6  |      | 2.2  |      |      | 1.9  | 2.7  | 2.3  |      |      |
| Rhamnose             | 1.4  | 1.3  | 1.6  |      | 1.2  |      | 1.5  |      |      | 1.3  | 2.6  | 2.4  |      |      |
| Arabinose            | 11.3 | 16.0 | 11.4 |      | 10.4 |      | 10.5 |      |      | 16.0 | 11.1 | 12.5 |      |      |
| Galactose            | 7.4  | 8.6  | 7.9  |      | 8.7  |      | 7.2  |      |      | 7.7  | 8.1  | 12.6 |      |      |
| Glucose              | 41.1 | 36.9 | 41.0 |      | 41.4 |      | 42.6 |      |      | 38.8 | 45.1 | 41.2 |      |      |
| Xylose               | 10.3 | 9.8  | 11.1 |      | 10.7 |      | 11.4 |      |      | 10.7 | 13.9 | 13.8 |      |      |
| Mannose              | 5.6  | 6.0  | 6.2  |      | 5.7  |      | 5.0  |      |      | 5.3  | 4.8  | 3.8  |      |      |
| Galacturonic acid    | 20.4 | 19.9 | 18.3 |      | 19.7 |      | 19.5 |      |      | 18.2 | 11.6 | 11.4 |      |      |
| Glucuronic acid      | tr   | tr   | tr   |      | tr   |      | tr   |      |      | tr   | tr   | tr   |      |      |

All analyses were performed in duplicate (technical replicates); relative half range uncertainties were mostly < 10 %. A = Galiwa, B = Pinova Evelina, C = Elstar v. d. Zalm, D = Ladina, E = Red Topaz, F = PRI 037, G = Gemini, H = Zari, I = PRI 010, J = Crimson Crisp, K = Isaaq, L = Allurel, M = Natyra, N = Lubera, tr = traces.

**Supplementary Table 3:** Galacturonic acid contents (g/100 g dry matter) of the non-starch polysaccharides of different apple cultivars before (upper line) and after storage (lower line).

|                   | <b>Galacturonic acid<br/>content</b> | <b>R/2</b> |
|-------------------|--------------------------------------|------------|
| Galiwa            | 23.2                                 | 0.5        |
|                   | 29.6                                 | 0.8        |
| Pinova Evelina    | 25.6                                 | 1.1        |
|                   | 32.1                                 | 1.4        |
| Elstar v. d. Zalm | 24.1                                 | 0.2        |
|                   | 30.4                                 | 0.9        |
| Ladina            | 22.2                                 | 0.1        |
|                   | -                                    | -          |
| Red Topaz         | 26.8                                 | 0.5        |
|                   | 32.5                                 | 1.1        |
| PRI 037           | 21.7                                 | 0.5        |
|                   | -                                    | -          |
| Gemini            | 26.6                                 | 0.1        |
|                   | 30.1                                 | 0.6        |
| Zari              | 25.5                                 | 1.5        |
|                   | -                                    | -          |
| PRI 010           | 24.7                                 | 0.1        |
|                   | -                                    | -          |
| Crimson Crisp     | 27.9                                 | 0.4        |
|                   | 28.2                                 | 0.7        |
| Isaaq             | 28.1                                 | 0.0        |
|                   | 28.8                                 | 0.6        |
| Allurel           | 26.1                                 | 0.8        |
|                   | 20.0                                 | 0.2        |
| Natyra            | 22.8                                 | 0.7        |
|                   | -                                    | -          |
| Lubera            | 23.4                                 | 0.4        |
|                   | -                                    | -          |

All analyses were performed in duplicate (technical replicates); relative half range uncertainties were mostly < 5 %.

**Supplementary Table 4:** Monosaccharide composition (mol%) of the non-starch polysaccharides of different apple cultivars before and after storage. The monosaccharide composition was determined by high performance anion exchange chromatography after methanolysis and trifluoroacetic acid hydrolysis.

|                      | <b>A</b> | <b>B</b> | <b>C</b> | <b>D</b> | <b>E</b> | <b>F</b> | <b>G</b> | <b>H</b> | <b>I</b> | <b>J</b> | <b>K</b> | <b>L</b> | <b>M</b> | <b>N</b> |
|----------------------|----------|----------|----------|----------|----------|----------|----------|----------|----------|----------|----------|----------|----------|----------|
| Fucose               | 2.6      | 2.1      | 2.3      | 2.8      | 2.3      | 2.0      | 2.4      | 2.5      | 2.6      | 2.5      | 2.2      | 1.9      | 1.9      | 2.7      |
| Rhamnose             | 4.2      | 3.6      | 4.2      | 4.1      | 3.5      | 3.6      | 4.0      | 4.2      | 3.5      | 4.4      | 4.5      | 3.6      | 3.6      | 4.3      |
| Arabinose            | 32.4     | 34.1     | 33.3     | 30.3     | 31.4     | 28.9     | 32.7     | 32.3     | 30.2     | 31.3     | 34.0     | 28.7     | 28.1     | 32.5     |
| Galactose            | 15.8     | 20.4     | 17.9     | 12.8     | 22.7     | 24.8     | 15.8     | 17.2     | 21.0     | 16.2     | 14.7     | 26.1     | 24.8     | 12.6     |
| Glucose              | 4.4      | 4.1      | 3.8      | 8.0      | 4.5      | 3.4      | 4.3      | 3.4      | 3.6      | 3.6      | 3.5      | 3.5      | 4.4      | 3.7      |
| Xylose               | 14.7     | 13.7     | 14.1     | 16.6     | 13.4     | 13.0     | 15.4     | 14.7     | 14.0     | 14.3     | 14.7     | 13.4     | 13.6     | 16.6     |
| Mannose              | 5.3      | 4.7      | 6.4      | 3.9      | 4.3      | 4.9      | 4.7      | 5.1      | 4.7      | 4.9      | 4.1      | 3.8      | 3.8      | 4.3      |
| Galacturonic acid    | 19.9     | 16.6     | 17.2     | 21.0     | 17.2     | 18.6     | 20.8     | 20.5     | 19.9     | 23.0     | 22.4     | 18.6     | 19.3     | 22.6     |
| Glucuronic acid      | 1.1      | 0.6      | 0.7      | 0.7      | 0.8      | 0.7      | tr       | tr       | 0.7      | tr       | tr       | 0.7      | 0.4      | 0.7      |
| <b>After storage</b> |          |          |          |          |          |          |          |          |          |          |          |          |          |          |
| Fucose               | 3.9      | 3.2      | 3.5      |          | 4.0      |          | 3.7      |          |          | 3.6      | 4.1      | 3.9      |          |          |
| Rhamnose             | 6.3      | 5.1      | 6.6      |          | 5.6      |          | 5.8      |          |          | 5.2      | 6.9      | 6.0      |          |          |
| Arabinose            | 24.9     | 31.5     | 24.4     |          | 22.2     |          | 22.4     |          |          | 30.8     | 20.2     | 21.1     |          |          |
| Galactose            | 14.7     | 16.1     | 15.5     |          | 16.4     |          | 13.7     |          |          | 14.4     | 14.3     | 21.6     |          |          |
| Glucose              | 5.9      | 5.5      | 5.6      |          | 6.4      |          | 5.2      |          |          | 4.8      | 5.1      | 4.7      |          |          |
| Xylose               | 18.7     | 16.5     | 18.2     |          | 19.3     |          | 20.7     |          |          | 18.0     | 19.4     | 18.3     |          |          |
| Mannose              | 3.9      | 3.5      | 4.3      |          | 3.9      |          | 3.5      |          |          | 3.1      | 3.6      | 2.7      |          |          |
| Galacturonic acid    | 21.5     | 18.6     | 21.7     |          | 22.3     |          | 24.3     |          |          | 19.6     | 25.9     | 21.2     |          |          |
| Glucuronic acid      | tr       | tr       | tr       |          | tr       |          | 0.8      |          |          | 0.7      | 0.8      | 0.8      |          |          |

All analyses were performed in duplicate (technical replicates); relative half range uncertainties were mostly < 10 %. A = Galiwa, B = Pinova Evelina, C = Elstar v. d. Zalm, D = Ladina, E = Red Topaz, F = PRI 037, G = Gemini, H = Zari, I = PRI 010, J = Crimson Crisp, K = Isaaq, L = Allurel, M = Natyra, N = Lubera, tr = traces.
